# Supplementary material for: Cost-effectiveness analysis of different systolic blood pressure targets for people with a history of stroke or transient ischaemic attack: Economic analysis of the PAST-BP study
Source: PubMed Central journal article supplement (PMC5030727; doi:10.1177/2047487316651982), 2016-05-25
Supplement: Web_Table_1.pdf [file Web_Table_1.pdf]

Web Table 1 Results of sensitivity analysis

|                             | Costs (£) | QALYs  | Incremental cost (£) | Incremental QALYs | ICER (£/QALY) |
|-----------------------------|-----------|--------|----------------------|-------------------|---------------|
| <i>Varying time horizon</i> |           |        |                      |                   |               |
| <i>20 years</i>             |           |        |                      |                   |               |
| Standard target             | 8,962     | 7.1032 |                      |                   |               |
| Intensive BP lowering       | 8,794     | 7.1762 | -168                 | 0.0729            | Dominant      |
| <i>10 years</i>             |           |        |                      |                   |               |
| Standard target             | 5,092     | 5.1861 |                      |                   |               |
| Intensive BP lowering       | 5,012     | 5.2191 | -80                  | 0.0329            | Dominant      |
| <i>7 years</i>              |           |        |                      |                   |               |
| Standard target             | 3,387     | 4.0737 |                      |                   |               |
| Intensive BP lowering       | 3,362     | 4.0916 | -25                  | 0.0179            | Dominant      |
| <i>6 years</i>              |           |        |                      |                   |               |
| Standard target             | 2,786     | 3.6247 |                      |                   |               |
| Intensive BP lowering       | 2,779     | 3.6381 | -7                   | 0.0134            | Dominant      |
| <i>3 years</i>              |           |        |                      |                   |               |
| Standard target             | 1,270     | 2.0192 |                      |                   |               |
| Intensive BP lowering       | 1,286     | 2.0225 | 15                   | 0.0034            | 4,590         |
| <i>2 years</i>              |           |        |                      |                   |               |
| Standard target             | 834       | 1.3954 |                      |                   |               |
| Intensive BP lowering       | 850       | 1.3967 | 15                   | 0.0012            | 11,707        |
| <i>1 year</i>               |           |        |                      |                   |               |
| Standard target             | 409       | 0.7233 |                      |                   |               |
| Intensive BP lowering       | 419       | 0.7234 | 10                   | 0.00007           | 141,231       |

---

*Varying acute and chronic costs simultaneously*

---

*30 percent decrease*

|                       |       |        |   |        |    |
|-----------------------|-------|--------|---|--------|----|
| Standard target       | 7,173 | 7.4719 |   |        |    |
| Intensive BP lowering | 7,177 | 7.5539 | 4 | 0.0820 | 44 |

*30 percent increase*

|                       |        |        |      |        |          |
|-----------------------|--------|--------|------|--------|----------|
| Standard target       | 12,604 | 7.4719 |      |        |          |
| Intensive BP lowering | 12,263 | 7.5539 | -341 | 0.0820 | Dominant |

---

*30 per cent increase in the initial cost for the Intensive BP lowering arm*

---

|                       |        |        |     |        |       |
|-----------------------|--------|--------|-----|--------|-------|
| Standard target       | 9,889  | 7.4719 |     |        |       |
| Intensive BP lowering | 10,093 | 7.5539 | 204 | 0.0820 | 2,492 |

---

*Varying the intensive BP lowering arm according to the 95% CI of the BP reduction difference achieved at 12 months*

---

*0.2 points difference*

|                       |        |        |     |        |        |
|-----------------------|--------|--------|-----|--------|--------|
| Standard target       | 9,889  | 7.4719 |     |        |        |
| Intensive BP lowering | 10,188 | 7.4824 | 299 | 0.0104 | 28,613 |

*5.7 points difference*

|                       |       |        |      |        |          |
|-----------------------|-------|--------|------|--------|----------|
| Standard target       | 9,889 | 7.4719 |      |        |          |
| Intensive BP lowering | 9,345 | 7.6125 | -543 | 0.1406 | Dominant |

---

*Reduction in quality of life due to antihypertensive medication in the intensive BP lowering arm*

---

*1 percent reduction*

---

---

|                             |       |        |      |         |          |
|-----------------------------|-------|--------|------|---------|----------|
| Standard target             | 9,889 | 7.4719 |      |         |          |
| Intensive BP lowering       | 9,720 | 7.4944 | -169 | 0.0225  | Dominant |
| <i>2 percent reduction</i>  |       |        |      |         |          |
| Standard target             | 9,889 | 7.4719 |      |         |          |
| Intensive BP lowering       | 9,720 | 7.4349 | -169 | -0.0371 | ** 4,552 |
| <i>5 percent reduction</i>  |       |        |      |         |          |
| Standard target             | 9,889 | 7.4719 |      |         |          |
| Intensive BP lowering       | 9,720 | 7.2562 | -169 | -0.2157 | ** 782   |
| <i>10 percent reduction</i> |       |        |      |         |          |
| Standard target             | 9,889 | 7.4719 |      |         |          |
| Intensive BP lowering       | 9,720 | 6.9584 | -169 | -0.5135 | ** 328   |

---

\*\* These positive ICERs represent points in the south-west quadrant of the incremental cost-effectiveness plane: they indicate a cost saving accompanied by a loss of QALYs. In each case, the ICER is below all recognised thresholds: if these were to be the true values, this would indicate that the cost saving was not worth making.
